# Supplementary material
Source: Research Square preprint supplement (doi:10.21203/rs.3.rs-8443063/v1)
Supplement: Supplementary file 1 [file 018b349fe48f2a63b88ca612.doc]

**Table S 2 The antibodies for WB, IHC, and IF**

| Name | Description | Company | Catalogue number | Applications |
| --- | --- | --- | --- | --- |
| α-SMA | Alpha-smooth muscle actin | GeneTex | GTX18147 | WB, IF, IHC |
| Bcl-2 | B-cell lymphoma-2 | [GeneTex](https://www.biocompare.com/100423-GeneTex/) | GTX100064 | WB, IF, IHC |
| Bax |  | [GeneTex](https://www.biocompare.com/100423-GeneTex/) | GTX109683 | WB, IF, IHC |
| Caspase 9 |  | [GeneTex](https://www.biocompare.com/100423-GeneTex/) | GTX112888 | WB, IHC |
| CD31 | Cluster of differentiation 31 | [R&D Systems, a Bio-Techne Brand](https://www.biocompare.com/100364-R-D-Systems/) | AF3628 | WB, IF, IHC, FCM |
| CD34 | Cluster of differentiation 34 | Becton Dickinson | 751621 | FCM |
| CD44 | Cluster of differentiation 44 | [Bioss Inc.](https://www.biocompare.com/104473-Bioss-Inc/) | bs-2507R-PE | FCM |
| CD45 | Cluster of differentiation 45 | [GeneTex](https://www.biocompare.com/100423-GeneTex/) | GTX44565 | FCM, IF |
| CD63 | Cluster of differentiation 63 | abcam | ab217345 | WB, IF |
| CD71 | Cluster of differentiation 71 | [MyBioSource.com](https://www.biocompare.com/104355-MyBioSource-com/) | MBS215085 | FCM |
| CD90 | Cluster of differentiation 90 | Becton Dickinson | 561973 | FCM |
| CD105 | Cluster of differentiation 105 | [Biorbyt](https://www.biocompare.com/104369-Biorbyt/) | orb488557 | FCM |
| CD133 | Cluster of differentiation 133 | [Biorbyt](https://www.biocompare.com/104369-Biorbyt/) | orb703845 | FCM |
| Collagen I |  | [GeneTex](https://www.biocompare.com/100423-GeneTex/) | GTX26308 | IF, WB, IHC |
| ERK1/2 | Extracellular regulated protein kinases | [GeneTex](https://www.biocompare.com/100423-GeneTex/) | GTX134462 | WB(43) |
| GAPDH | Glyceraldehyde-3- phosphate dehydrogenase | [GeneTex](https://www.biocompare.com/100423-GeneTex/) | GTX100118 | WB, IF, IHC |
| GLUT1 | Solute carrier family 2 member 1 | [GeneTex](https://www.biocompare.com/100423-GeneTex/) | GTX66071 | WB |
| HK2 | Hexokinase II | [BosterBio](https://www.biocompare.com/104918-Boster-Biological-Technology/) | M01389-3 | WB, IF, FCM |
| HSP27 | Heat shock protein 27 | [GeneTex](https://www.biocompare.com/100423-GeneTex/) | GTX101145 | WB, IF, IHC |
| IL6 | Interleukin 6 | [GeneTex](https://www.biocompare.com/100423-GeneTex/) | GTX110527 | WB, IF, IHC |
| iNOS | Nitric oxide synthase 2, inducible | [GeneTex](https://www.biocompare.com/100423-GeneTex/) | GTX130246 | WB, IF, IHC |
| Ki-67 |  | [MyBioSource.com](https://www.biocompare.com/104355-MyBioSource-com/) | MBS5306554 | WB, IF |
| LDHA | Lactate dehydrogenase A | [GeneTex](https://www.biocompare.com/100423-GeneTex/) | GTX101416 | WB, IF, IHC |
| Oct4 | Octamer‑binding protein 4 | [United States Biological](https://www.biocompare.com/100162-United-States-Biological/) | O5403-01A | WB |
| TGF-β1 | Transforming growth factor-beta1 |  |  |  |
| Tie2 | Tyrosine kinase receptor 2‌ | [GeneTex](https://www.biocompare.com/100423-GeneTex/) | GTX107505 | WB |
| VECAD | Vascular endothelial cadherin | [Thermo Fisher Scientific](https://www.biocompare.com/100011-Thermo-Fisher-Scientific/) | 36-1900 | WB |
| VEGF | Vascular endothelial growth factor‌ | [BosterBio](https://www.biocompare.com/104918-Boster-Biological-Technology/) | PA1080 | WB, IF, IHC |
| VEGFR2 | Vascular endothelial growth factor  receptor 2‌ | [GeneTex](https://www.biocompare.com/100423-GeneTex/) | GTX129943 | WB(152) |
