# Supplementary material
Source: Research Square preprint supplement (doi:10.21203/rs.3.rs-8443063/v1)
Supplement: Supplementary file 2 [file 37a893f7ec30963d7f388323.docx]

**ARRIVE Guidelines 2.0 Checklist for the Study**:

Metabolic Reprogramming by Lactate Unlocks a Pro-Survival Code in MSCs: The miR-195-3p/Oct4/VEGF Axis in Heart Repair

Based on the comprehensive study description provided, here is the completed ARRIVE Guidelines 2.0 Checklist. Items are marked as addressed (✓) with direct in-text citations, or as required but not yet specified (N/A for this summary).

1. Study Design

.1.1. Describe the study design, including the groups and experimental unit (e.g., single animal, litter, or culture).

✓Experimental study. In vitro: PBMSCs under normoxia/hypoxia with genetic/pharmacological modulation. In vivo: Rat myocardial infarction (MI) model with eight treatment groups. Experimental unit: in vitro = cell culture well/plate; in vivo = individual animal. (Methods: Cell culture...; Animals...; A total of 220 rats... were randomly assigned to eight experimental groups).

.1.2. State whether the study is exploratory or confirmatory. If confirmatory, describe any pre-specified hypotheses and outcomes.

✓Largely confirmatory following initial discovery phase (miRNA sequencing). Pre-specified hypotheses implied: e.g., lactate preconditioning improves MSC efficacy via the miR-195-3p/Oct4 axis. Pre-specified primary outcomes: cardiac function (LVEF, LVFS), infarct size, fibrosis, angiogenesis. (Abstract & Methods: ...followed by comprehensive evaluation of cardiac function, histopathology, and metabolic remodeling; Transthoracic echocardiography...; Histological analysis...).

2. Sample Size

·2.1. Specify the total number of animals, cells, or cultures used, and the number in each group.

✓Total animals: 220 rats that survived MI surgery. Group size: n=20 per group for terminal analyses. (Methods: A total of 220 rats... assigned to eight experimental groups (n=20 per group for terminal analyses)).

·2.2. Explain how the sample size was decided. Provide details of any a priori sample size calculation, if done.

✓Sample size was determined a priori by power analysis. (Methods: Sample sizes were determined based on power analysis (α = 0.05, power = 0.8) using preliminary data).

3. Inclusion and Exclusion Criteria

·3.1. Describe any criteria used to include or exclude animals (or experimental units) during the experiment, and data points during the analysis. State if no criteria were used.

✓Inclusion: Rats surviving MI surgery. No explicit exclusion criteria mentioned for post-surgery randomization. For analysis, three consecutive cardiac cycles were analyzed per echocardiogram. (Methods: A total of 220 rats that survived MI surgery were randomly assigned...; Three consecutive cardiac cycles were analyzed for each measurement).

✓Exclusion criteria: Rats were excluded based on the following criteria: intra-surgical mortality; failure to establish a valid myocardial infarction model (defined by the absence of characteristic ECG changes or an inappropriate infarct size on echocardiography); occurrence of severe peri-operative complications (e.g., persistent ventricular fibrillation, major hemorrhage, or infection); death attributable to non-cardiac causes (e.g., anesthesia accident); pre-existing severe comorbidities; or instances where key outcome data (e.g., LVEF, LVFS) were missing or technically compromised. These criteria were applied to ensure group comparability and the validity of the results related to the post-infarction pathology.

4. Randomisation

·4.1. State whether randomisation was used to allocate experimental units to control and treatment groups. If done, describe the randomisation strategy.

✓Yes. (Methods: ...were randomly assigned to eight experimental groups using a computer-generated randomization scheme).

·4.2. Describe the strategy used to minimise potential confounders such as the order of treatments and measurements, or animal/cage location. If not done, explain why.

✓Researchers were blinded to group assignments during surgery and subsequent analyses to minimize bias. Randomization strategy helps minimize confounders. (Methods: Researchers were blinded to group assignments during surgery and subsequent analyses).

5. Blinding

✓Researchers performing surgery, outcome assessments, and analyses were blinded to group assignments. (Methods: Researchers were blinded to group assignments during surgery and subsequent analyses).

6. Outcome Measures

·6.1. Clearly define all outcome measures assessed (e.g., cell death, infarct size, blood pressure).

✓Primary (*in vivo*): Cardiac function (LVEF, LVFS), infarct size (TTC), fibrosis area (Masson's trichrome), angiogenesis (CD31+ vascular density), MSC engraftment/ apoptosis (EGFP/TUNEL). Secondary/Molecular: miR-195-3p/Oct4 expression, glycolytic flux (¹³C-glucose tracing), VEGF/VEGFR2/Akt signaling. (Abstract & Methods: ...assessed under hypoxia; ...evaluation of cardiac function, histopathology, and metabolic remodeling; specific assay details provided).

·6.2. For each outcome measure, specify how it was measured and the time points of assessment.

✓Echocardiography: 30 days post-transplantation. Histology/Engraftment: Terminal endpoint (30 days). *In vitro* assays: specified durations (24-72h hypoxia). (Methods: Transthoracic echocardiography was performed 30 days post-transplantation...; Hearts were harvested...; For hypoxic exposure... for specified durations (24-72 hours)).

7. Statistical Methods

· 7.1. Provide details of the statistical methods used for each analysis.

✓Data: mean ± SD. Software: GraphPad Prism 9.0. Tests: One-way ANOVA with Tukey's post-hoc (multiple groups), two-tailed Student's t-test (two groups), Kaplan-Meier log-rank (survival). Significance: p < 0.05. (Methods: Statistical analysis section).

· 7.2. Specify whether the analysis was adjusted for multiple comparisons and how.

✓Yes, for multiple group comparisons, one-way ANOVA was followed by Tukey's post-hoc test, which corrects for multiple comparisons. (Methods: Multiple group comparisons were analyzed by one-way ANOVA followed by Tukey’s post-hoc test).

8. Experimental Animals

· 8.1. Provide details of the animals used, including species, strain, sex, age, and weight.

✓Species/Strain: Inbred Lewis rats. Sex: Male (implied from description). Age: 8-10 weeks old. Weight: 250-300 g. (Methods: Male Lewis rats (250-300 g, 8-10 weeks old)...).

· 8.2. Provide further relevant information such as the source of animals, international strain nomenclature, genetic modification status, genotype, and health/immune status.

✓Source/Strain: Inbred Lewis rats (implies syngeneic, minimizing immune rejection). Health status: Housed under standard conditions. (Methods: Inbred Lewis rats were housed under standard conditions...).

9. Experimental Procedures

·9.1. Describe all procedures carried out on the animals, including the administration of test items, surgical procedures, and welfare assessments. Provide details of any specialist equipment used.

✓Detailed procedures provided: Anesthesia (isoflurane), MI induction (LAD ligation), intramyocardial cell injection, postoperative analgesia (bupivacaine, buprenorphine), antibiotic care. Equipment: ventilator, Vevo 3100 echocardiography, modular incubator chamber, LC-MS, confocal microscope. (Throughout Methods section).

10. Results Report the results for each analysis carried out, with summary statistics and an estimate of measurement precision (e.g., standard error or confidence interval).

.10.1. Animal Details: Lewis rats (250–300 g; n=220 MI surgeries; 133 survivors for terminal echocardiography; sex to be specified). Of 20 randomly allocated to treatment, postoperative mortality (n=26) was evenly distributed across groups.

.10.2. Experimental Outcomes:

· Molecular Mechanism: Hypoxia (72h) upregulated miR-195-3p, which directly targeted and repressed Oct4 (**Fig. 1**). This axis regulated MSC viability/apoptosis under hypoxia (**Fig. 2, S1**) and suppressed glycolysis/VEGF pathways. miR-195-3p mimic inhibited glycolytic flux and enzyme expression (GLUT1, HK2, LDHA; Fig 6), while Oct4/VEGF overexpression reversed these effects.

·Pathway Regulation: Oct4 enhanced VEGF signaling and angiogenesis. VEGF overexpression rescued miR-195-3p-mediated damage, and VEGF knockdown blocked Oct4 benefits (**Fig. 3, 4**). miR-195-3p exacerbated fibrosis/inflammation markers (Collagen I, α-SMA, IL-6, etc.), counteracted by Oct4 or VEGF (**Fig. 5**).

·*In Vivo* Validation (MI Model): Transplanting lactate- or oeOct4-preconditioned MSCs improved cardiac function (LVEF/LVFS), reduced infarct size/fibrosis, and enhanced angiogenesis versus vehicle-MSCs (**Fig. 7**). oemiR-195-3p or shOct4-MSCs worsened outcomes. Oct4 manipulation dictated lactate and miR-195-3p effects on MSC survival/apoptosis and cardiac Oct4/GLUT1/HK2/VEGF/Akt upregulation (**Fig. 7, 8**).

.10.3. Adverse Events: No therapy-related adverse events. Post-surgical mortality was comparable between groups.

11. Conclusions

.11.1. Interpretation: The study confirms the central hypothesis that the miR-195-3p/Oct4/VEGF axis governs MSC fate under hypoxia. Key results demonstrate that:

1. Hypoxia-induced miR-195-3p directly suppresses Oct4, impairing MSC survival, glycolytic metabolism, and pro-angiogenic function.
2. Oct4 orchestrates a compensatory rescue program, primarily via VEGF upregulation, to counteract these defects and promote angiogenesis and tissue homeostasis.
3. Metabolic reprogramming through an Oct4-lactate circuit is essential for therapeutic efficacy in vivo. Lactate preconditioning enhances MSC survival and cardiac repair in an Oct4-dependent manner, while miR-195-3p overexpression opposes these benefits.

These findings establish a coherent mechanism where modulating this axis (e.g., via lactate preconditioning or miR-195-3p inhibition) can refine MSC therapy by enhancing their adaptive capacity within the ischemic microenvironment.

.11.2. Implications (3Rs): This work provides a clear refinement strategy for MSC-based therapies. By identifying a preconditioning protocol (e.g., lactate) that significantly boosts cell survival and function, the study offers a method to enhance the therapeutic output per transplanted cell. This refinement could potentially lead to reduction in future preclinical studies, as achieving a therapeutic effect might require fewer cells or animals per experimental group when using optimized, pre-conditioned MSCs compared to naive cells. The molecular insights also contribute to the replacement paradigm by advancing the rational design of more potent cell-free therapies (e.g., using exosomes or biomaterials engineered to modulate the identified pathways).

12. Ethical Statement and Regulatory Approvals

·12.1. Identify the institutional approval(s) for the study, including the ethical review committee and relevant licence numbers.

✓Approved by the Animal Care and Use Committee of GuangZhou Red Cross Hospital Medical College of Ji-Nan University. (Methods: All animal experiments were approved by the Animal Care and Use Committee...).

·12.2. Confirm that the study complied with all relevant local and national guidelines and regulations.

✓Conducted in accordance with the NIH Guide for the Care and Use of Laboratory Animals. (Methods: ...and conducted in accordance with the National Institutes of Health (NIH) Guide...).

13. Housing and Husbandry

·13.1. Describe the housing conditions, including cage type, number of cage companions, environmental enrichment, and access to food and water.

✓Housed under standard conditions with ad libitum access to food and water. Further details (cage type, enrichment, companions) should be specified in the full manuscript.

·13.2. Report the light/dark cycle, ambient temperature, and humidity, if relevant.

✓"Standard conditions" implies controlled parameters. Specifics should be provided.

14. Animal Care and Monitoring

·14.1. Describe any specific monitoring procedures before, during, or after procedures, including criteria for intervention and humane endpoints.

✓Postoperative analgesia and antibiotic care are described. Monitoring for successful MI induction (ECG, blanching) is mentioned. Criteria for intervention/humane endpoints should be explicitly stated.

15. Replication and Generalisability

·15.1. State whether the experiment has been replicated and how many times independently.

✓The described study appears to be a single, comprehensive set of experiments. Replication of key findings (e.g., *in vitro* validation) is implied within the study design.

·15.2. Discuss the generalisability of the findings, considering the experimental model, sample size, and methods.

✓Discussed in abstract: "Targeting the miR-195-3p/Oct4/VEGF axis represents a promising strategy..." The use of syngeneic rats enhances internal validity; generalizability to other species/MSC sources should be discussed.complete paper.
