# Supplementary material
Source: Research Square preprint supplement (doi:10.21203/rs.3.rs-8443063/v1)
Supplement: Supplementary file 3 [file 4b9dd6a1697b15b070feed63.doc]

**Table S1 Sequences of primers used for gene amplification.**

| **Genes** | **Forward** | **Reverse** |
| --- | --- | --- |
| α-SMA | 5′--3′CTTGCTAACGGAGGCG | 5′- -3′TCCAGAGTCCAGCACAATAC |
| Bcl-2 | 5′--3′GAGGAACTCTTCAGGGATGG | 5′--3′TCCACAGAGCGATGTTGTC |
| Bax | 5′- -3′GCAAACTGGTGCTCAAGG | 5′- -3′GGTCCCGAAGTAGGAAAGG |
| Caspase 9 | 5′- -3′CGGTGGACATTGGTTCTG | 5′- -3′ACGTTGTTGATGATGAGGC |
| CD31 | 5′- -3′CCATCCTGTCGGGTAA | 5′--3′CATTCACGGTTTCTTCG |
| Collagen I | 5′- -3′CTGCCGATGTCGCTATCC | 5′- -3′CCACAAGCGTGCTGTAGGT |
| ERK1/2 | 5′--3′ACCGTGACCTCAAGCC | 5′--3′CAGCCCACAGACCAAA |
| GAPDH | 5′--3′TCGGACGCCTGGTTAC | 5′--3′TCGCTCCTGGAAGATGG |
| GLUT1 | 5′--3′TTCGGCTTAGACTCCATCA | 5′--3′GGTCTCGGGTCACATCG |
| HK2 | 5′--3′ATCAGAACTGCGAGATTGG | 5′--3′GTTCGGATGTCATTGAGTGTA |
| HSP27 | 5′- -3′AAGCACGAAGAAAGGCAGGAT | 5′- -3′GGACAGGGAAGAGGACACCAG |
| IL6 | 5′--3′ATGAACAGCGATGATGC | 5′- -3′CCAGGTAGAAACGGAAC |
| iNOS | 5′--3′ATCCCGAAACGCTACACTT | 5′--3′GCGGCTGGACTTCTCAC |
| Ki-67 | 5′--3′ATGGCGTCCTCAGCTCGCCTGGTCA | 5′- -3′TGACCAGGCGAGCTGAGGACGCCAT |
| LDHA | 5′--3′ACAAGGAGCAGTGGAAGG | 5′--3′GGACGCTGAGGAAGACAT |
| Oct4 | 5′--3′CTCACCCTGGGCGTTCT | 5′--3′GGTCTCCGATTTGCATATCTC |
| TGF-β1 | 5′--3′CCCACTGATACGCCTGAG | 5′--3′TGATCCCATTGATTTCCAC |
| Tie2 | 5′- -3′ACTTTGCAGGAGAACTGG | 5′- -3′CACTCGGCTCTTACGC |
| VECAD | 5′--3′CGACGCTTCTACCACTTC | 5′--3′GGTCTTGCGGATGGAG |
| VEGF | 5′- -3′TCCTGGAGCGTTCACTG | 5′- -3′CACCGCCTTGGCTTGT |
| VEGFR2 | 5′- -3′CTAACTATCCGAAGGGTGA | 5′- -3′GCCGACGAGAATAATGAC |
