# Supplementary material
Source: Research Square preprint supplement (doi:10.21203/rs.3.rs-8443063/v1)
Supplement: Supplementary file 4 [file 872e02f50896cdf1bcedd213.docx]

**Supplementary Data**

***Materials and Methods***

**Antibodies and reagents**

Primer sequences used in this study are listed in Supplementary **Table S1**. Antibody details are provided in Supplementary **Table S2**. 4′,6-Diamidino-2-phenylindole (DAPI; Sigma-Aldrich, catalog #28718-90-3) was used for nuclear staining.

***Animals***

All animal experiments were approved by the Animal Care and Use Committee of Ji-Nan University (Ethical Approval No. 20220923-02.), conducted in accordance with the National Institutes of Health (NIH) Guide for the Care and Use of Laboratory Animals, and adhere to ARRIVE 2.0 guidelines. Inbred Lewis rats were housed under standard conditions with ad libitum access to food and water.

***Cell culture and hypoxic treatment***

Peripheral blood-derived mesenchymal stem cells (PBMSCs) were isolated from rat abdominal aortic blood [1] and cultured in complete growth medium (DMEM/F-12 supplemented with 10% fetal bovine serum [FBS; Gibco] and 1% penicillin/streptomycin) at 37°C in a humidified atmosphere of 5% CO2. For hypoxic exposure, passage 2 cells were placed in a modular incubator chamber (Billups-Rothenberg) flushed with a gas mixture containing 1% O2, 5% CO2, and balanced N2 for specified durations (24-72 hours). Normoxic controls were maintained at 21% O2 and 5% CO2.

***miRNA sequencing and bioinformatics analysis***

Total RNA was extracted from normoxic and hypoxic PBMSCs using TRIzol reagent(Invitrogen). miRNA sequencing libraries were prepared with the QIAseq miRNA Library Kit (Qiagen) and sequenced on an Illumina NextSeq 550 platform. Raw sequencing data were processed using the miRDeep2 pipeline for miRNA identification and quantification. Differential expression analysis was performed with DESeq2, applying a significance threshold of |log2 fold change| > 1 and an adjusted p-value < 0.05. Potential miRNA targets were predicted using TargetScan v8.0 and miRDB.

**Gene expression analysis by quantitative RT-PCR**

Total RNA was reverse transcribed using the PrimeScript RT Reagent Kit(Takara). Quantitative PCR was performed on a QuantStudio 6 Pro system (Applied Biosystems) using SYBR Green Master Mix (Roche). Relative quantification was calculated by the 2–ΔΔCT method, with GAPDH as the endogenous control. Primer sequences are listed in Supplementary **Table S1**.

***miRNA transfection***

To investigate whether miR-195-3p directly targets Oct4, PBMSCs were transfected with a miR-195-3p mimic (for overexpression) or an inhibitor sponge (for suppression; both synthesized by Syngentech, Shanghai, China). Scrambled miRNA or non-targeting sponge were used as negative controls.

***Plasmid construction and transfection***

The precursor sequence of miR-195-3p was cloned into the pMXs vector(Addgene) for overexpression. For reporter assays, a 300-bp fragment of the Oct4 3’-UTR containing the predicted binding site was inserted into the pmirGLO Dual-Luciferase vector (Promega). A mutant reporter was generated by site-directed mutagenesis using the Q5 Site-Directed Mutagenesis Kit (NEB). Coding sequences of Oct4 and VEGF were cloned into the pcDNA3.1 vector for overexpression. Short hairpin RNAs (shRNAs) targeting Oct4 and VEGF were designed and cloned into the pLKO.1 vector. All constructs were verified by Sanger sequencing. Transfections were performed using Lipofectamine 3000 (Invitrogen) according to the manufacturer’s instructions.

***Luciferase reporter assay***

HEK-293T cells were co-transfected with 100 ng of wild-type or mutant Oct4 3’-UTR reporter construct and 50 nM miR-195-3p mimic or negative control (GenePharma) using Lipofectamine 3000. After 48 hours, firefly and Renilla luciferase activities were measured using the Dual-Luciferase Reporter Assay System (Promega) on a GloMax Navigator Microplate Luminometer (Promega). Firefly luciferase activity was normalized to Renilla luciferase activity.

***Western blot analysis***

Cells were lysed in RIPA buffer supplemented with protease and phosphatase inhibitors(Roche). Protein concentrations were determined using the BCA assay (Pierce). Equal amounts of protein (20-30 μg) were separated by 10% SDS-PAGE and transferred to PVDF membranes (Millipore). Membranes were blocked with 5% non-fat milk and incubated overnight at 4°C with primary antibodies (Supplementary **Table S2**). After incubation with HRP-conjugated secondary antibodies, signals were detected using ECL substrate (Bio-Rad) and imaged with a ChemiDoc MP Imaging System (Bio-Rad).

***Cell viability and proliferation assays***

Cell viability was assessed using the Cell Counting Kit-8 (CCK-8; Dojindo). Briefly, 5×103 cells/well were seeded in 96-well plates and incubated with 10 μL CCK-8 reagent for 2 hours. Absorbance was measured at 450 nm using a microplate reader (BioTek). For proliferation analysis, cells were stained with Ki67 antibody (Supplementary Table S2) and counterstained with DAPI. Positive cells were counted in five random fields per sample using a fluorescence microscope (Nikon Eclipse Ti2).

***Apoptosis analysis by flow cytometry***

Apoptosis was detected using the Annexin V-FITC/PI Apoptosis Detection Kit(BD Biosciences). Briefly, 1×105 cells were collected, washed with cold PBS, and resuspended in 100 μL binding buffer containing 5 μL Annexin V-FITC and 5 μL PI. After 15 minutes of incubation in the dark, 400 μL binding buffer was added, and samples were analyzed within 1 hour using a BD FACS Celesta flow cytometer. Data were processed with FlowJo v10.8 software.

***Cytokine array analysis***

The expression of 200 cytokines was profiled using the AAH-CYT-G2000 Array(RayBiotech) according to the manufacturer’s instructions. Array membranes were blocked and incubated with cell culture supernatants overnight at 4°C. After washing, membranes were incubated with a biotinylated antibody cocktail and then with HRP-streptavidin. Signals were detected by chemiluminescence and quantified using ImageJ software.

***Microarray and Pathway Enrichment Analysis***

Total RNA was extracted from MSCs under defined conditions and hybridized to the Rat Genome 230 2.0 Array. After data normalization, differentially expressed genes (DEGs) were identified using standard fold-change (e.g., ≥1.5) and significance (p<0.05) thresholds. Gene Set Enrichment Analysis (GSEA) was performed to identify biological pathways and processes significantly altered between comparison groups. The top enriched pathways were visualized in a heatmap based on normalized enrichment scores (NES) and false discovery rates (FDR).

***Immunofluorescence staining***

Cells were fixed with 4%paraformaldehyde. Tissue sections were deparaffinized, rehydrated, and subjected to antigen retrieval. Samples were permeabilized with 0.1% Triton X-100 and blocked with 5% BSA. Primary antibodies (Supplementary **Table S2**) were applied overnight at 4°C. After washing, samples were incubated with Alexa Fluor-conjugated secondary antibodies (1:500; Invitrogen) for 1 hour at room temperature. Nuclei were counterstained with DAPI, and images were captured using a confocal microscope (Zeiss LSM 880).

***Metabolic analysis***

The extracellular acidification rate (ECAR) and glycolytic proton efflux rate (glycoPER) were measured using the Seahorse XF Glycolysis Stress Test Kit (Agilent) on a Seahorse XFe96 Analyzer. Briefly, 2×104 cells/well were seeded in XF96 cell culture microplates. On the day of the assay, cells were washed and incubated in XF assay medium (Agilent) at 37°C in a non-CO₂ incubator for 1 hour. Measurements were taken under basal conditions and after sequential injection of 10 mM glucose, 1 μM oligomycin (Cayman Chemicals), and 50 mM 2-deoxyglucose (2-DG; Sigma). Glucose uptake was measured using the Glucose Uptake Assay Kit (Cayman Chemical), and lactate production was quantified using the Lactate Assay Kit (Sigma-Aldrich) according to the manufacturers’ protocols.

***RNA sequencing and gene set enrichment analysis***

Total RNA from miR-195-3p-overexpressing and control PBMSCs was extracted using the RNeasy Plus Mini Kit (Qiagen). RNA quality was assessed using an Agilent 2100 Bioanalyzer. Libraries were prepared with the TruSeq Stranded mRNA Library Prep Kit (Illumina) and sequenced on an Illumina NovaSeq 6000 platform. Reads were aligned to the human reference genome (GRCh38) using STAR, and gene counts were obtained with featureCounts. Differential expression analysis was performed using DESeq2. Gene Set Enrichment Analysis (GSEA) was conducted using the GSEA software (Broad Institute) with the Hallmark and KEGG gene sets.

***Animal model and MI surgery***

Male Lewis rats (250-300 g, 8-10 weeks old) were anesthetized with 2% isoflurane, intubated, and ventilated. MI was induced by permanent ligation of the left anterior descending coronary artery. Briefly, a left thoracotomy was performed at the fourth intercostal space to expose the heart, and the LAD was ligated 2-3 mm from its origin with a 7-0 polypropylene suture. Successful infarction was confirmed by visual observation of myocardial blanching and ST-segment elevation on electrocardiogram (ECG). Rats were excluded if they died during surgery, failed to develop a myocardial infarction (evidenced by lack of characteristic ECG changes or inappropriate infarct size on echocardiography), suffered severe complications (e.g., persistent ventricular fibrillation, hemorrhage, infection), died from non-cardiac causes (e.g., anesthesia accident), had pre-existing severe comorbidities, or had missing/compromised key data (e.g., LVEF, LVFS). This ensured result validity.

***PBMSCs preconditioning and EGFP labeling***

To determine the optimal lactate concentration for preconditioning, PBMSCs were treated with a gradient of sodium lactate (0, 5, 10, 15, and 20 mM; Sigma-Aldrich) for 48 hours under hypoxic condition. Subsequent analyses of cell viability and proliferation indicated that 10 mM sodium lactate yielded the greatest enhancement in both parameters (Supplementary **Figure S1**). Based on these results, PBMSCs were preconditioned with 10 mM sodium lactate for 24 hours prior to transplantation. Lentiviral vectors encoding the miR-195-3p precursor, Oct4 coding sequence, or Oct4-specific shRNA were constructed and packaged in HEK-293T cells. PBMSCs were transduced at a multiplicity of infection (MOI) of 50 with 8 μg/mL polybrene (Sigma-Aldrich). At 24 hours post-transduction, cells were co-transfected with a lentiviral vector containing enhanced GFP (EGFP) cDNA, as described previously [2]. More than 70% of PBMSCs were EGFP-positive, as confirmed by fluorescence microscopy and Western blot 72 hours post-transduction.

***Experimental groups and cell transplantation***

A total of 220 rats that survived MI surgery were randomly assigned to eight experimental groups (n=20 per group for terminal analyses) using a computer-generated randomization scheme. Researchers were blinded to group assignments during surgery and subsequent analyses. The groups received intramyocardial injections of the following: PBS control, vehicle-treated MSCs, lactate-preconditioned MSCs, miR-195-3p-overexpressing MSCs (*oe*miR-195-3p), Oct4-overexpressing MSCs (*oe*Oct4), Oct4-knockdown MSCs (*sh*Oct4), lactate-preconditioned+Oct4-knockdown MSCs, or miR-195-3p-overexpressing+Oct4- overexpressing MSCs. Cell transplantation was performed via injection into the infarct and peri-infarct regions (5×106 cells in four sites, 10 μL/site). Postoperative analgesia included 2.5% bupivacaine sprayed at the incision site and intramuscular buprenorphine hydrochloride (0.03 mg/kg). Triple antibiotic ointment was applied to the wound after closure.

***Echocardiographic assessment***

Transthoracic echocardiography was performed 30 days post-transplantation using a Vevo 3100 imaging system(VisualSonics) with a 21-MHz transducer. Rats were anesthetized with 1.5% isoflurane and maintained at heart rates of 350-450 bpm. Left ventricular (LV) parameters were measured from M-mode recordings in the parasternal long-axis view. LV ejection fraction (LVEF) and LV fractional shortening (LVFS) were calculated using the built-in software. Three consecutive cardiac cycles were analyzed for each measurement.

***Histological analysis***

Hearts were harvested, fixed in 4% paraformaldehyde, and embedded in paraffin. Serial sections (5 μm thickness) were cut from the infarct region for staining. Infarct size was assessed by 2, 3, 5-triphenyltetrazolium chloride (TTC) staining after 30 minutes of incubation at 37°C. Collagen deposition was evaluated by Masson’s trichrome staining. Fibrosis area was quantified using ImageJ software (NIH) and expressed as a percentage of the total LV area.

***Engraftment and angiogenesis***

Engraftment was evaluated by determining the proportion of EGFP-positive cells among all isolated ventricular cells. Apoptosis was detected by TUNEL staining using the In Situ Cell Death Detection Kit (Roche). Images were captured using a Zeiss LSM 880 confocal microscope and analyzed with ZEN software. The apoptosis rate of transplanted PBMSCs was expressed as the percentage of TUNEL+ EGFP+ cells relative to all EGFP+ cells in the ischemic hearts 30 days post-transplantation. Peri-infarct regions were paraffin-embedded, and sections were stained with CD31 to assess vascular density. Angiogenesis was evaluated by calculating the proportion of CD31-positive cells.

***Metabolic tracing studies***

For ¹³C-glucose tracing, isolated cardiomyocytes from experimental groups were incubated with [U-¹³C] glucose (Cambridge Isotope Laboratories) for 4 hours. Metabolites were extracted with 80% methanol and analyzed by liquid chromatography-mass spectrometry (LC-MS) using a Q Exactive HF mass spectrometer (Thermo Scientific). Isotopic labeling patterns were analyzed with Xcalibur software and MetaboAnalyst 5.0.

***Statistical analysis***

Data are presented as mean± SD. Statistical analyses were performed using GraphPad Prism 9.0. Multiple group comparisons were analyzed by one-way ANOVA followed by Tukey’s post-hoc test. Comparisons between two groups were analyzed by two-tailed Student’s t-test. Survival analysis was performed using the Kaplan–Meier method with the log-rank test. A p-value <0.05 was considered statistically significant. Sample sizes were determined based on power analysis (α = 0.05, power = 0.8) using preliminary data.

**References**

1. Wang P, Deng Z, Li A, Li R, Huang W, Cui J, Chen S, Li B, Zhang S. β-Catenin promotes long-term survival and angiogenesis of peripheral blood mesenchymal stem cells via the Oct4 signaling pathway. Exp Mol Med. 2022; 54(9): 1434-1449.

2. Li Y, Hunter A, Wakeel MM, Sun G, Lau RWK, Broughton BRS, Pino IEO, Deng Z, Zhang T, Murthi P, Del Borgo MP, Widdop RE, Polo JM, Ricardo SD, Samuel CS. The renoprotective efficacy and safety of genetically-engineered human bone marrow-derived mesenchymal stromal cells expressing anti-fibrotic cargo. Stem Cell Res Ther. 2024; 15(1): 375.

**Legends for Figures and Tables**

**Figure S1 Functional role of miR-195-3p in MSC survival under hypoxia**. (**A**) Representative optical micrographs of MSCs following 72-hour hypoxic culture after transfection with negative control (NC) mimic, miR-195-3p mimic, NC inhibitor, or miR-195-3p inhibitor. Scale bar: 50 µm. (**B**) Apoptosis of MSCs under hypoxia for 72 hours, as assessed by flow cytometry, following transfection with NC mimic, miR-195-3p mimic, NC inhibitor, or miR-195-3p inhibitor. (**C**) Viability of MSCs under hypoxia for 72 hours, evaluated using CCK-8 assay, after transfection with NC mimic, miR-195-3p mimic, NC inhibitor, or miR-195-3p inhibitor. (**D**) Statistical analysis of apoptosis rates from (**B**). Con: Blank control. Data are presented as mean ± SD (n = 5 technical replicates). Statistical significance was determined by one-way ANOVA. **P* < 0.051, ***P* < 0.01, ****P* < 0.001.

**Figure S2 Effects of lactate on MSC survival under hypoxic conditions.** (**A**) Representative immunofluorescence images showing Ki67 (green) and DAPI (blue) staining in MSCs following 72-hour hypoxia exposure with the addition of lactate at indicated concentrations (0–20 mM). Scale bar: 50 µm. (**B**, **C**) Quantitative analysis of (**B**) MSC viability by CCK-8 assay, and (**C**) the proportion of Ki67-positive cells from (**A**). All data are expressed as mean ± SD (n = 10). ***P < 0.001 by one-way ANOVA.

**Table S1. Primer sequences used for qRT-PCR**.

**Table S2. Antibodies used in immunofluorescence (IF), immunohistochemistry (IHC), and western blot (WB)**.
