# Supplementary material
Source: Research Square preprint supplement (doi:10.21203/rs.3.rs-8443063/v1)
Supplement: Supplementary file 5 [file ad61989084bbb87485ac4a2d.pdf]

**Original Western blot images (Original Western blot images corresponding to Figure 1F,1I, 2I, 3K, 4O, 5I, 6K, and 8D.)**

**Figure 1F**

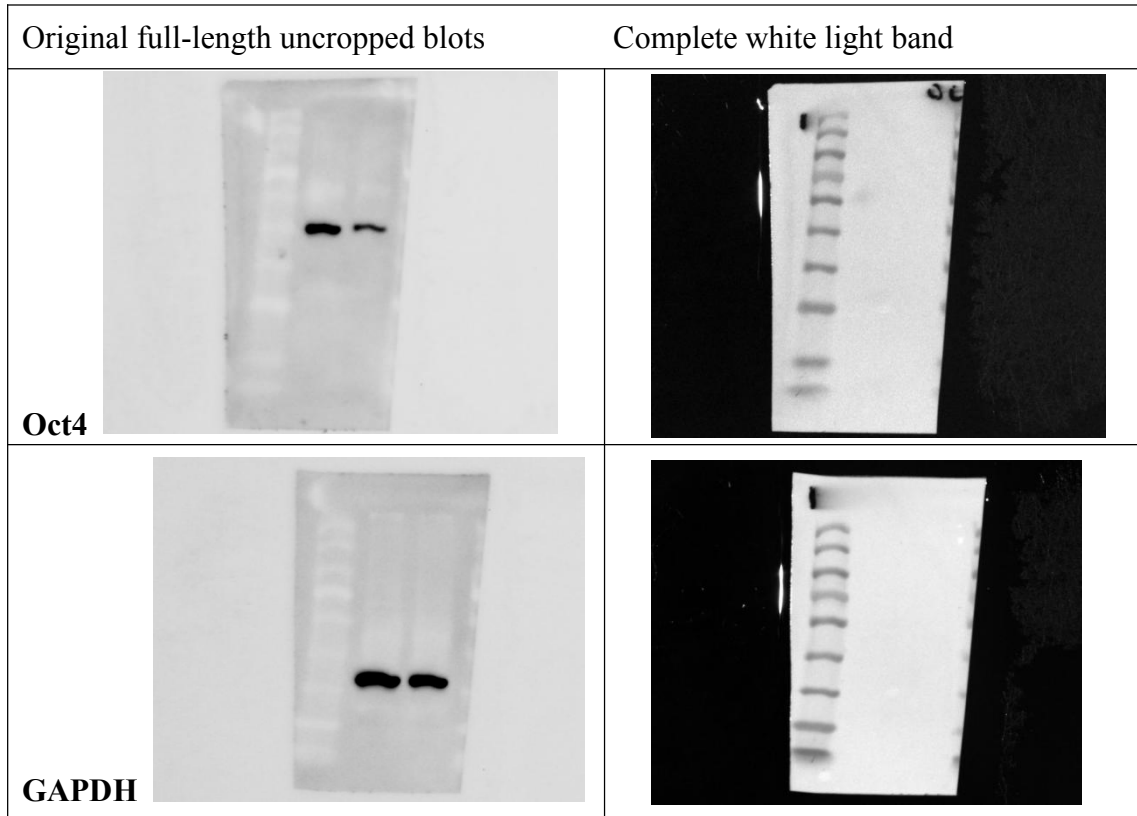

**Figure 1F** Western blot analysis of Oct4 protein levels in MSCs under normoxia versus hypoxia for 72 hours.

**Figure 1I**

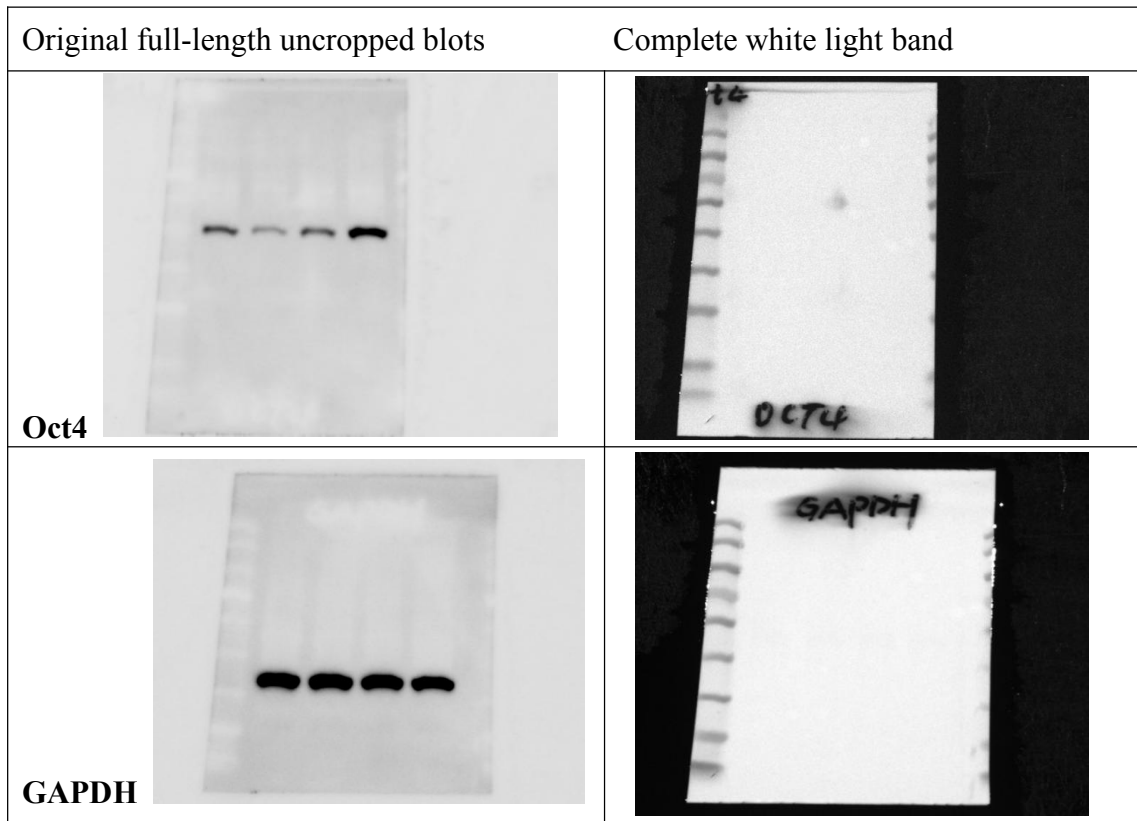

**Figure 1I** Western blot analysis of Oct4 protein in hypoxic MSCs transfected with NC mimic, miR-195-3p mimic, NC inhibitor, or miR-195-3p inhibitor for 72 hours. Culture conditions: Normoxia (21% O<sub>2</sub>, 5% CO<sub>2</sub>, balance N<sub>2</sub>); Hypoxia (1% O<sub>2</sub>, 5% CO<sub>2</sub>, balance N<sub>2</sub>).

**Figure 2I**

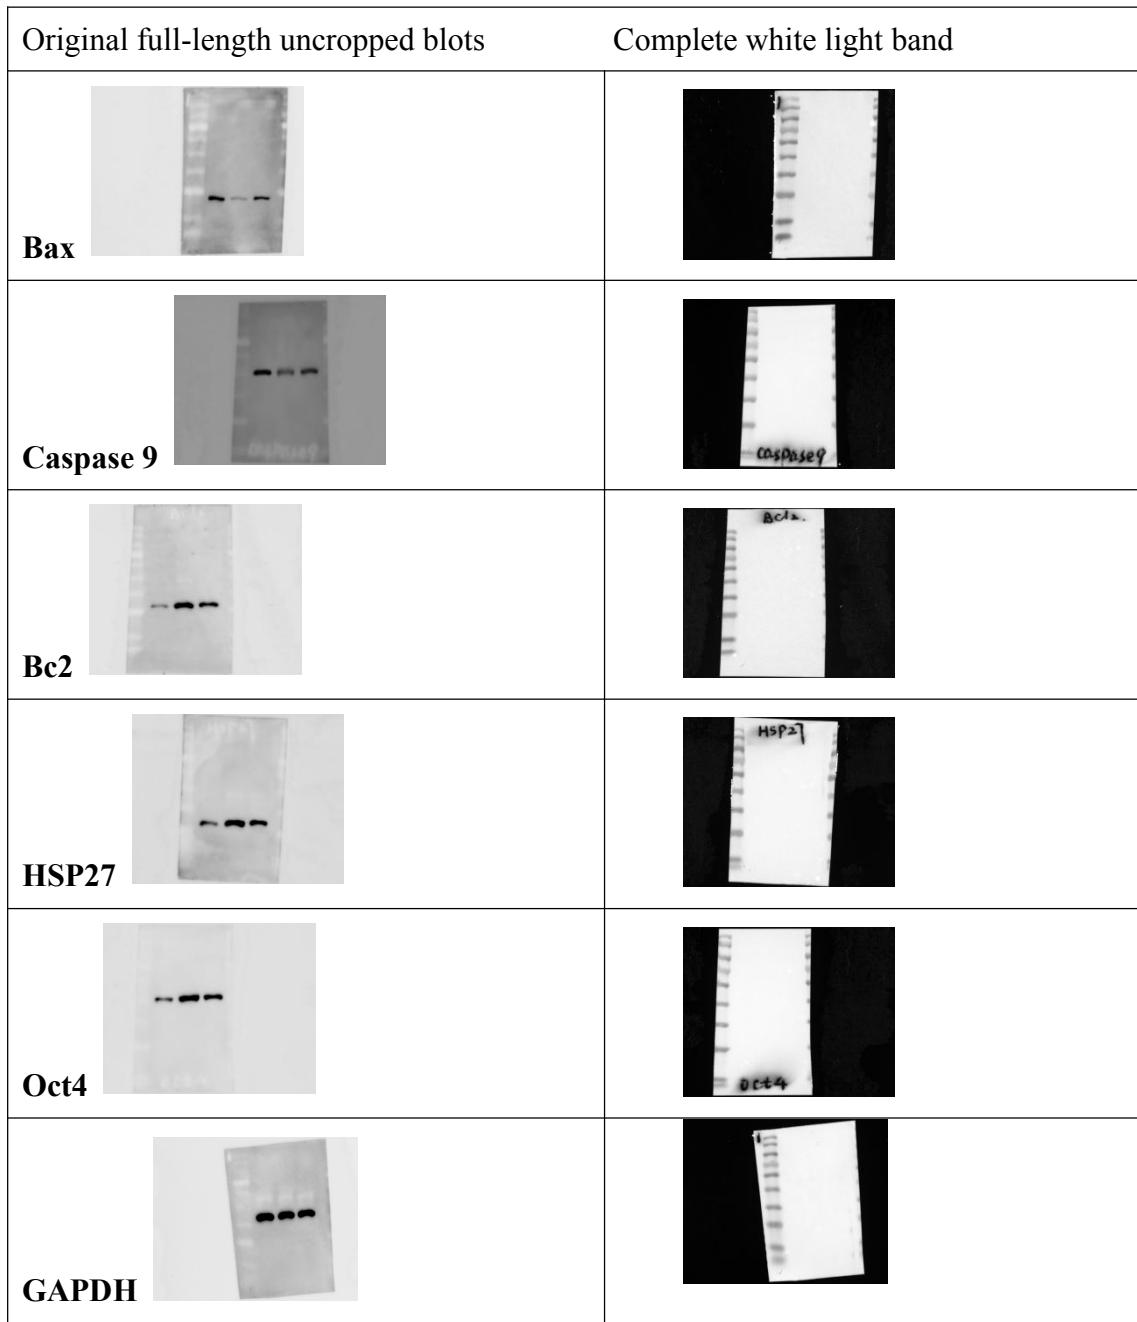

**Figure 2I** Representative Western blots showing protein levels of Bax, Caspase 9, Bcl-2, Hsp27, and Oct4 in MSCs after 72 hours of hypoxia with or without miR-195-3p mimic or *oe*Oct4.

**Figure 3K**

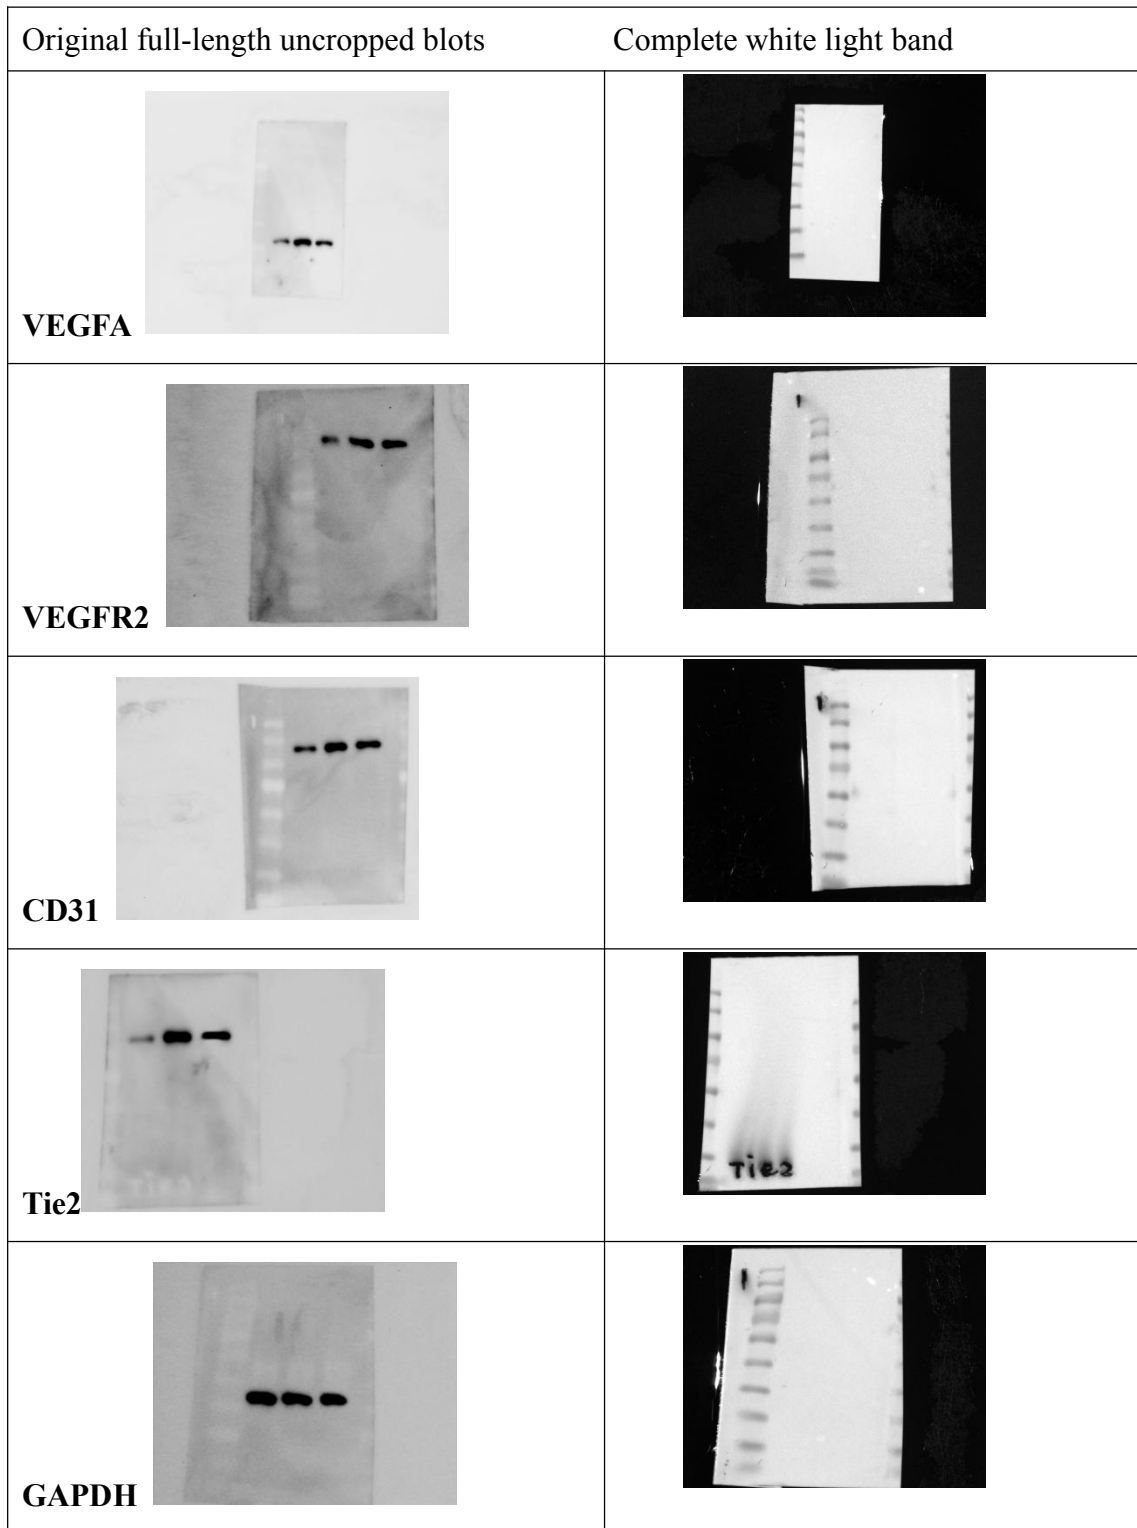

**Figure 3K** Western blot analysis of VEGFA, VEGFR2, Tie2, and CD31 protein expression in MSCs after 7 days of hypoxic culture with VEGF overexpression (*oe*VEGF) and/or miR-195-3p mimic.

**Figure 40**

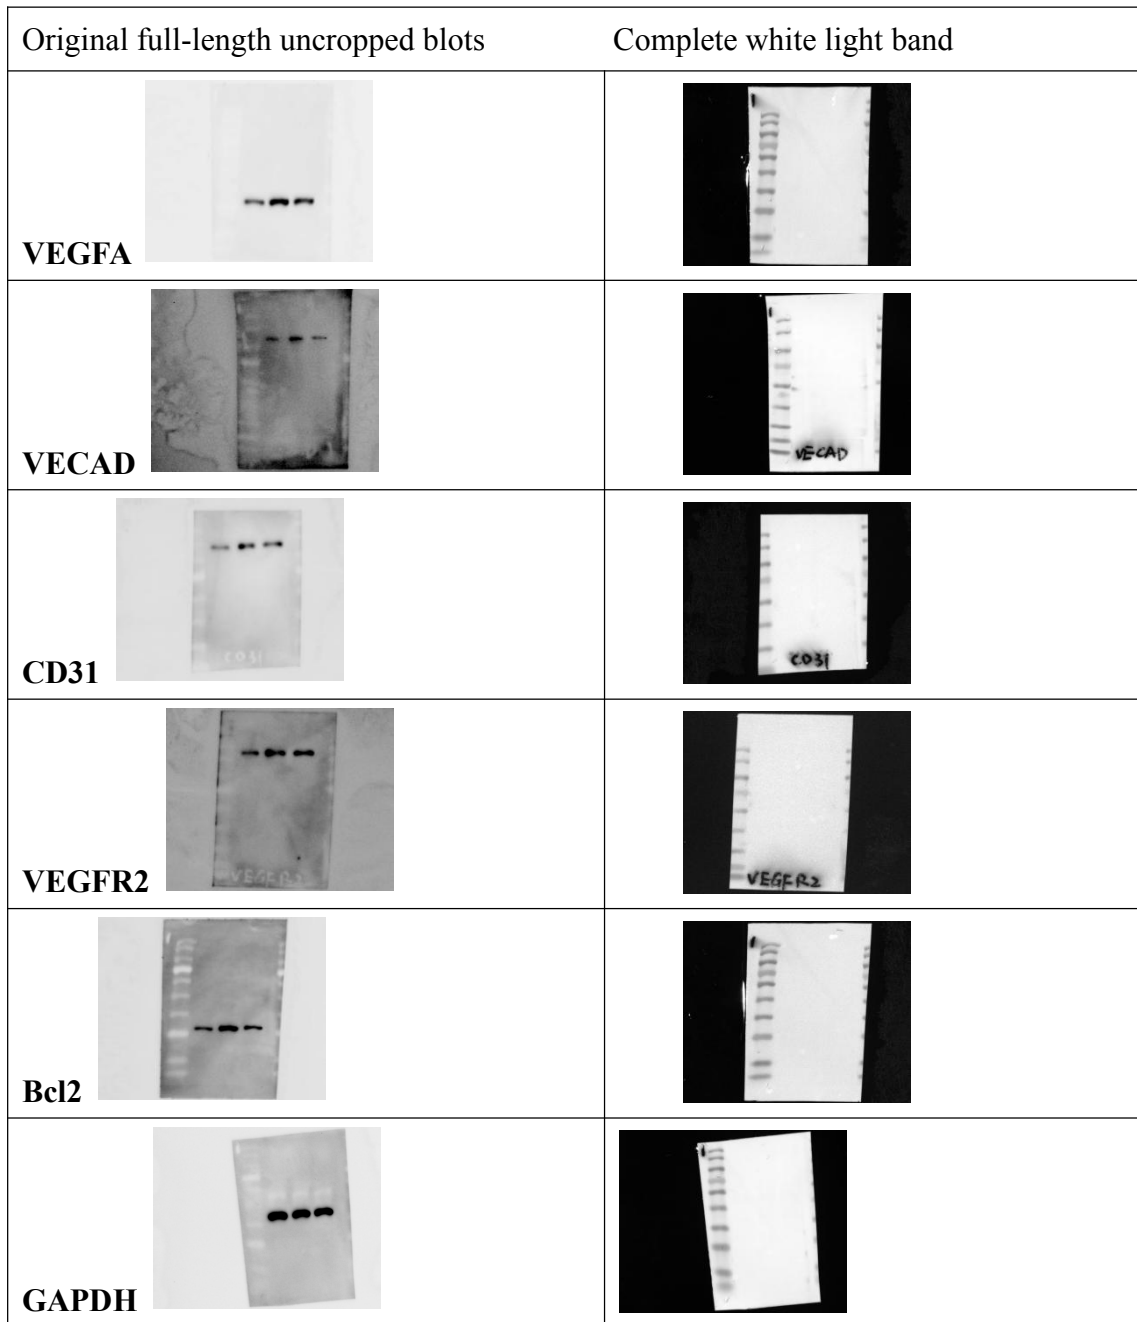

**Figure 40** Protein levels of VEGFA, VEGFR2, CD31, VECAD, and Bcl2 detected by Western blot in MSCs after 7 days of hypoxia with or without *oe*Oct4 or *sh*VEGF.

**Figure 5I**

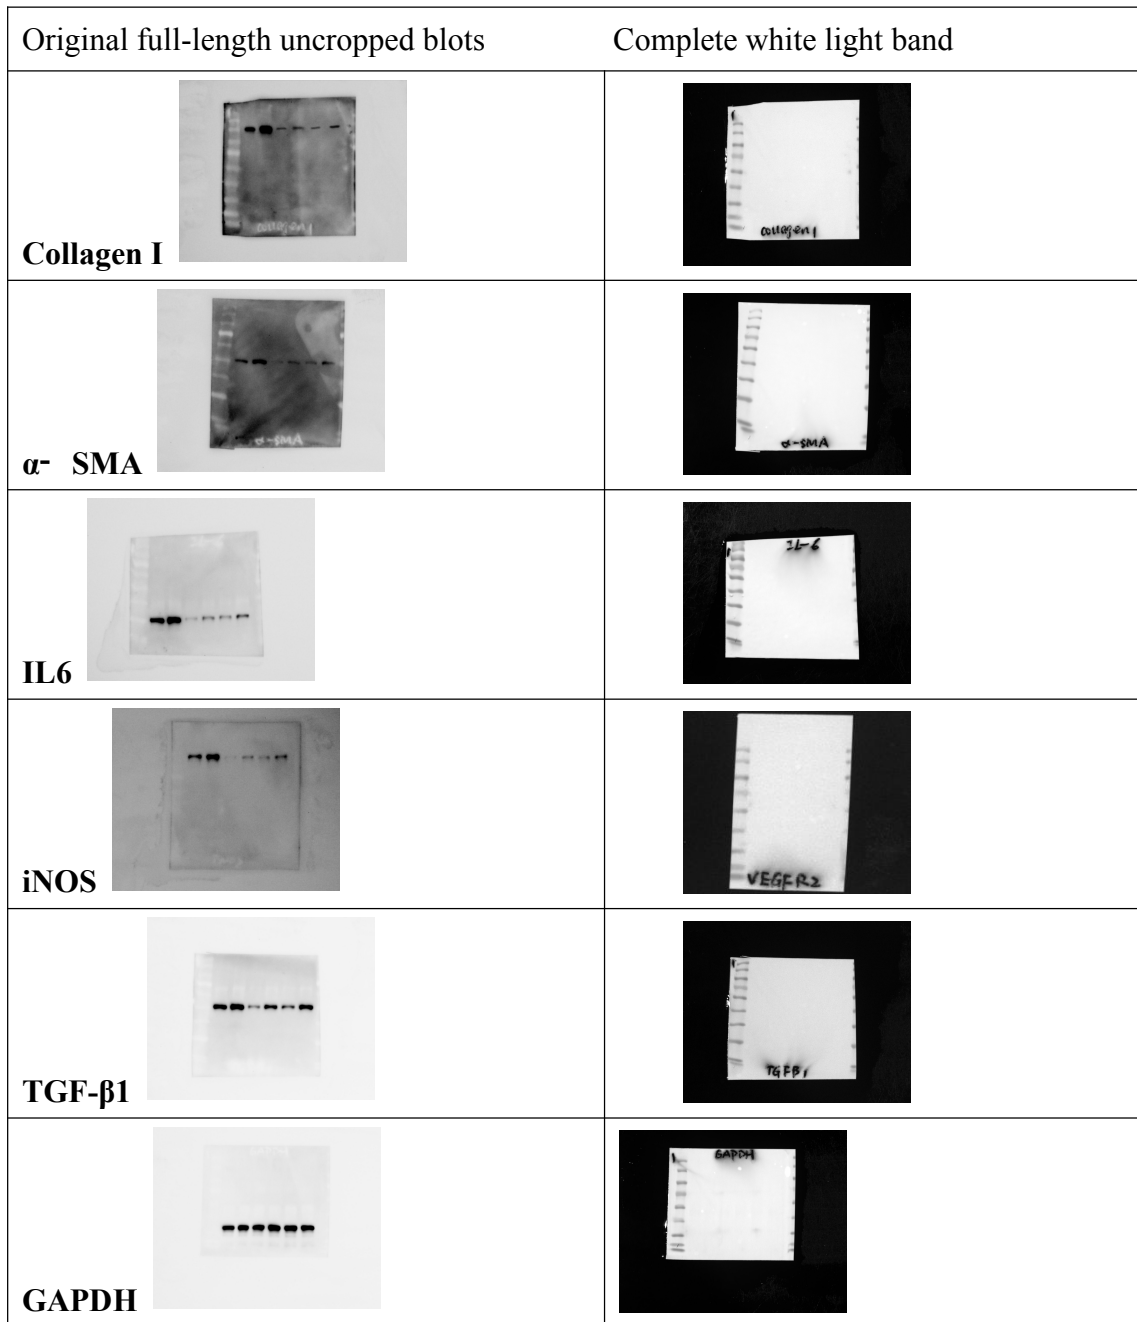

**Figure 5I** Protein levels of collagen I,  $\alpha$ -SMA, IL6, iNOS, and TGF- $\beta$ 1 assessed by Western blot in MSCs after 7 days of hypoxia with or without miR-195-3p mimic, *oe*Oct4, *oe*VEGF, and/or *sh*VEGF treatment.

**Figure 6K**

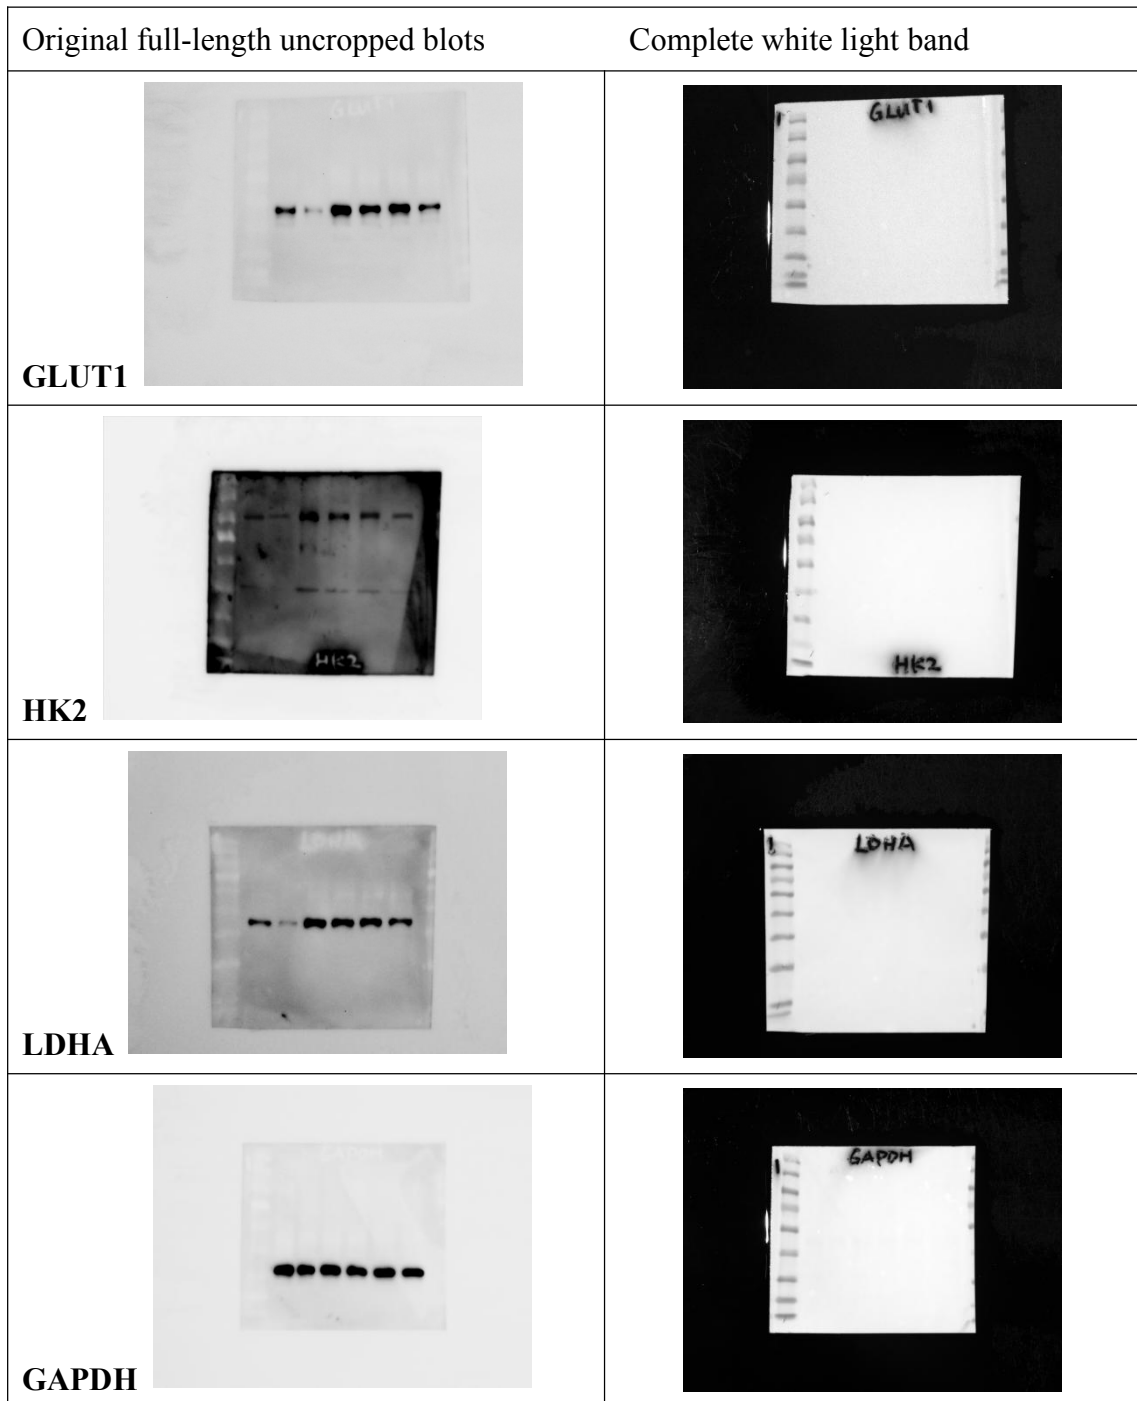

**Figure 6K** Western blot analysis of key glycolytic enzymes in MSCs treated with CON, miR-195-mimic alone, *oe*Oct4 alone, *oe*VEGF alone, or miR-195-mimic combined with *oe*Oct4 or *oe*VEGF.

**Figure 8D**

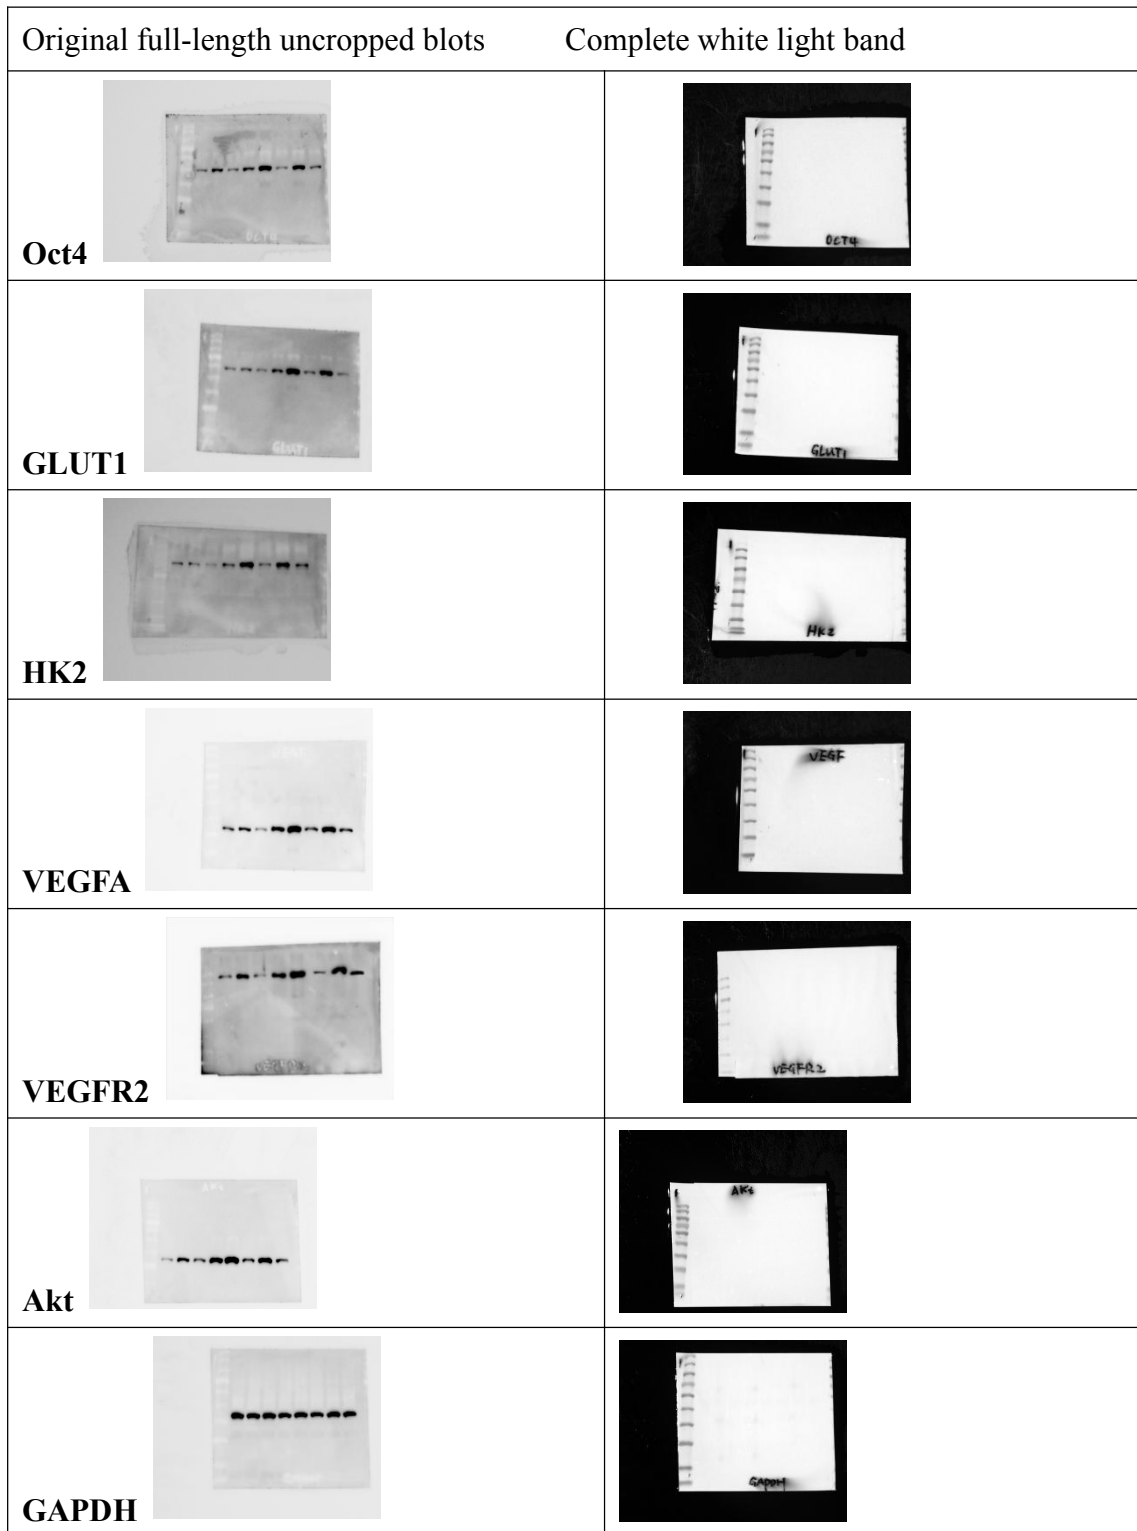

**Figure 8D** Representative immunoblots and quantitative analysis of Oct4, GLUT1, HK2, VEGFA, VEGFR2, and Akt protein levels in myocardial tissues from rats treated with PBS or MSCs preconditioned with vehicle, lactate, *oe*miR-195-3p, *oe*Oct4, *sh*Oct4, lactate + *oe*Oct4, or *oe*miR-195-3p + *sh*Oct4.
